# Supplementary material for: Exploring the Impact of Silicosis Incidence on Tuberculosis Mortality and Morbidity: A Multi-Country Study
Source: MDPI journal article supplement (doi:10.3390/medsci11040063), 2023-10-01
Supplement: s1 [file s1]

**Supplementary Table S1: Source of Data**

| <b>Variables</b>                                     | <b>Data Source</b>                                |
|------------------------------------------------------|---------------------------------------------------|
| Silicosis                                            | Global Burden of Disease                          |
| Sanitation                                           | The World Bank                                    |
| Malnutrition                                         | The World Bank                                    |
| Alcohol Consumption                                  | The World Bank                                    |
| Poverty                                              | The World Bank                                    |
| Handwashing Facilities                               | The World Bank                                    |
| Unsanitary Household Conditions                      | The World Bank                                    |
| Overcrowding                                         | The World Bank                                    |
| Smoking                                              | Global Burden of Disease                          |
| Diabetes                                             | Global Burden of Disease                          |
| HIV                                                  | Global Burden of Disease                          |
| Overcrowding in house                                | The World Bank                                    |
| Indoor Air Pollution                                 | The World Bank                                    |
| Global Incidence of Tuberculosis                     | Institute of Health Metrics and Evaluation (IHME) |
| Global Prevalence of Tuberculosis                    | Institute of Health Metrics and Evaluation (IHME) |
| Deaths due to Tuberculosis                           | Institute of Health Metrics and Evaluation (IHME) |
| Years of Life Lost due to Tuberculosis               | Institute of Health Metrics and Evaluation (IHME) |
| Years Lived with Disability Lost due to Tuberculosis | Institute of Health Metrics and Evaluation (IHME) |

**Supplementary Table S2: Global Burden of Tuberculosis**

| <b>S.No.</b> | <b>Country Name</b> | <b>Incidence of TB (per 100,000 people)</b> | <b>Prevalence of TB (%)</b> | <b>Deaths due to Tuberculosis</b> | <b>YLL lost due to Tuberculosis</b> | <b>YLD due to Tuberculosis</b> |
|--------------|---------------------|---------------------------------------------|-----------------------------|-----------------------------------|-------------------------------------|--------------------------------|
| 1            | Afghanistan         | 189                                         | 0.16662204                  | 3627.116429                       | 162497.8967                         | 12566.64357                    |
| 2            | Albania             | 16                                          | 0.173748103                 | 11.05254781                       | 242.8596876                         | 74.10237758                    |
| 3            | Algeria             | 61                                          | 0.098426038                 | 445.1515356                       | 12751.36989                         | 3339.665766                    |
| 4            | American Samoa      | 2                                           | 0.346816972                 | 0.708139418                       | 21.16304854                         | 8.518451714                    |
| 5            | Andorra             | 8                                           | 0.080270793                 | 0.267676177                       | 4.807188996                         | 1.397010633                    |
| 6            | Angola              | 351                                         | 0.290412017                 | 11751.95191                       | 539953.9166                         | 37953.41371                    |
| 7            | Antigua and Barbuda | 0                                           | 0.210553689                 | 0.372840031                       | 11.1883079                          | 9.614079858                    |
| 8            | Argentina           | 29                                          | 0.188152287                 | 726.8908082                       | 23408.92984                         | 2652.011236                    |
| 9            | Armenia             | 26                                          | 0.202106634                 | 72.80981276                       | 2600.659736                         | 471.1874899                    |
| 10           | Aruba               | 2                                           |                             |                                   |                                     |                                |
| 11           | Australia           | 7                                           | 0.114278189                 | 94.6286421                        | 1546.698504                         | 382.4151318                    |
| 12           | Austria             | 6                                           | 0.080261903                 | 50.07521305                       | 967.2662519                         | 223.7241143                    |
| 13           | Azerbaijan          | 60                                          | 0.243663008                 | 635.9790602                       | 27736.5259                          | 3434.239901                    |
| 14           | The Bahamas         | 15                                          | 0.231260043                 | 7.359544282                       | 268.8496633                         | 37.77837883                    |

|    |                          |     |             |             |             |             |
|----|--------------------------|-----|-------------|-------------|-------------|-------------|
| 15 | Bahrain                  | 12  | 0.146110917 | 11.06013523 | 355.5693163 | 122.3040115 |
| 16 | Bangladesh               | 221 | 0.078221645 | 29086.36342 | 900814.1794 | 97741.19153 |
| 17 | Barbados                 | 0   | 0.20969733  | 1.769608784 | 47.72151337 | 17.87042318 |
| 18 | Belarus                  | 29  | 0.171825734 | 298.1463519 | 10465.13513 | 1719.42885  |
| 19 | Belgium                  | 9   | 0.079053598 | 82.46353594 | 1370.794226 | 298.3198695 |
| 20 | Belize                   | 27  | 0.228957292 | 14.61685437 | 580.0288618 | 71.88950512 |
| 21 | Benin                    | 55  | 0.189676198 | 2623.917115 | 112297.0158 | 9207.974644 |
| 22 | Bermuda                  | 4   | 0.156496414 | 0.07907625  | 1.586068388 | 6.091519415 |
| 23 | Bhutan                   | 165 | 0.061241106 | 107.1903201 | 3414.500527 | 289.9087375 |
| 24 | Bolivia                  | 106 | 0.185022568 | 1549.861674 | 55409.20662 | 4568.069962 |
| 25 | Bosnia and Herzegovina   | 27  | 0.193829225 | 120.27935   | 2587.326735 | 300.7617569 |
| 26 | Botswana                 | 253 | 0.154839046 | 809.4803382 | 34896.03537 | 3491.631225 |
| 27 | Brazil                   | 46  | 0.270806068 | 5484.627591 | 187691.2104 | 25414.05669 |
| 28 | British Virgin Islands   | 4   |             |             |             |             |
| 29 | Brunei Darussalam        | 64  | 0.27618594  | 19.33403305 | 545.7338934 | 49.85636326 |
| 30 | Bulgaria                 | 21  | 0.195379223 | 121.4157065 | 3190.562738 | 568.530013  |
| 31 | Burkina Faso             | 47  | 0.198971216 | 7551.774873 | 350450.2391 | 22096.65394 |
| 32 | Burundi                  | 107 | 0.229124914 | 8721.028088 | 364311.6656 | 23259.15706 |
| 33 | Cabo Verde               | 46  | 0.146443565 | 60.38000176 | 1732.197657 | 297.569004  |
| 34 | Cambodia                 | 287 | 0.314517821 | 6045.602723 | 198209.6577 | 23276.44108 |
| 35 | Cameroon                 | 179 | 0.190936048 | 6551.458402 | 269925.69   | 21981.84461 |
| 36 | Canada                   | 6   | 0.111035374 | 148.9488706 | 2553.202056 | 591.7884233 |
| 37 | Cayman Islands           | 6   |             |             |             |             |
| 38 | Central African Republic | 540 | 0.366953849 | 8637.437753 | 421980.8541 | 10678.59457 |
| 39 | Chad                     | 142 | 0.220157991 | 6990.252502 | 339004.1128 | 17009.52586 |
| 40 | Channel Islands          |     |             |             |             |             |
| 41 | Chile                    | 18  | 0.159209868 | 456.2755522 | 10515.87938 | 1090.265192 |
| 42 | China                    | 58  | 0.318248816 | 36566.01974 | 956485.5806 | 408421.299  |
| 43 | Colombia                 | 35  | 0.229311975 | 908.3074827 | 26407.21027 | 4449.28048  |
| 44 | Comoros                  | 35  | 0.227918418 | 328.6778748 | 11143.30611 | 911.1358884 |
| 45 | Dem. Rep. Congo          | 320 | 0.313106547 | 46144.77444 | 1985057.298 | 132381.2866 |
| 46 | Congo, Rep.              | 373 | 0.300761747 | 1960.89537  | 76679.57911 | 5787.971139 |
| 47 | Costa Rica               | 10  | 0.2137157   | 46.71546215 | 1270.800018 | 241.6542448 |
| 48 | Cote d'Ivoire            | 137 | 0.21036991  | 7086.202956 | 299626.4973 | 22295.77063 |
| 49 | Croatia                  | 8   | 0.145472657 | 53.3865204  | 1112.341271 | 193.9885719 |
| 50 | Cuba                     | 7   | 0.183455201 | 42.28453938 | 981.4959065 | 591.7411199 |
| 51 | Curacao                  | 7   |             |             |             |             |
| 52 | Cyprus                   | 5   | 0.000480597 | 4.877462954 | 84.10219471 | 23.22477546 |
| 53 | Czech Republic           | 5   | 0.148011115 | 54.73055423 | 1159.629311 | 332.8051245 |
| 54 | Denmark                  | 5   | 0.08061606  | 27.01078129 | 505.8440269 | 131.8379494 |
| 55 | Djibouti                 | 234 | 0.185034222 | 436.9180032 | 17573.10095 | 1271.485294 |
| 56 | Dominica                 | 16  | 0.259558348 | 2.900635846 | 88.68666712 | 12.01806022 |

|    |                      |     |             |             |             |             |
|----|----------------------|-----|-------------|-------------|-------------|-------------|
| 57 | Dominican Republic   | 42  | 0.234603392 | 750.8166187 | 30901.05    | 3241.925577 |
| 58 | Ecuador              | 46  | 0.149822992 | 734.7025543 | 25596.72214 | 3313.335187 |
| 59 | Egypt, Arab Rep.     | 12  | 0.2850804   | 891.5657332 | 33033.78333 | 11695.85589 |
| 60 | El Salvador          | 58  | 0.252553152 | 89.42940068 | 2645.977825 | 440.3219289 |
| 61 | Equatorial Guinea    | 181 | 0.242399005 | 193.2657512 | 7849.702109 | 1064.106751 |
| 62 | Eritrea              | 86  | 0.242417038 | 4673.518546 | 194946.7629 | 14788.32286 |
| 63 | Estonia              | 13  | 0.156131064 | 24.35791107 | 730.8584263 | 145.8563822 |
| 64 | Eswatini             | 363 | 0.24507416  | 637.1359466 | 29255.86652 | 1968.492423 |
| 65 | Ethiopia             | 140 | 0.324872315 | 29874.07417 | 1174950.834 | 104424.3732 |
| 66 | Faroe Islands        |     |             |             |             |             |
| 67 | Fiji                 | 66  | 0.382663735 | 39.66847855 | 1311.423493 | 254.5688278 |
| 68 | Finland              | 5   | 0.077641147 | 55.06449105 | 791.1957304 | 138.4485381 |
| 69 | France               | 9   | 0.077022279 | 1052.539808 | 13063.13606 | 1869.258605 |
| 70 | French Polynesia     | 20  |             |             |             |             |
| 71 | Gabon                | 521 | 0.267156045 | 473.8264394 | 16938.25028 | 1617.168817 |
| 72 | Gambia, The          | 158 | 0.165620608 | 721.7725039 | 25252.10451 | 3116.660505 |
| 73 | Georgia              | 74  | 0.227950543 | 175.3494458 | 6720.296296 | 1000.823483 |
| 74 | Germany              | 6   | 0.081853779 | 462.4438745 | 7994.266444 | 2050.930729 |
| 75 | Ghana                | 144 | 0.2308767   | 10222.7113  | 375434.8302 | 29335.04451 |
| 76 | Gibraltar            |     |             |             |             |             |
| 77 | Greece               | 4   | 0.083077678 | 137.3176117 | 2134.770145 | 262.8828854 |
| 78 | Greenland            | 128 | 0.201836699 | 3.014502706 | 69.20992248 | 5.526810625 |
| 79 | Grenada              | 3   | 0.235909855 | 0.572760883 | 18.65601774 | 9.959505953 |
| 80 | Guam                 | 54  | 0.309385026 | 3.706850257 | 110.9565013 | 33.99312272 |
| 81 | Guatemala            | 26  | 0.291609196 | 418.9591905 | 17253.96314 | 1684.682818 |
| 82 | Guinea               | 176 | 0.221750365 | 4396.292712 | 179243.9501 | 11874.63985 |
| 83 | Guinea-Bissau        | 361 | 0.231351546 | 716.2075451 | 29238.89924 | 1418.86024  |
| 84 | Guyana               | 79  | 0.270902728 | 60.54016869 | 2362.381766 | 210.6901034 |
| 85 | Haiti                | 170 | 0.328742851 | 1285.69985  | 59339.81212 | 4617.616537 |
| 86 | Honduras             | 31  | 0.291534239 | 558.3634119 | 17259.99637 | 1432.081791 |
| 87 | Hong Kong SAR, China | 63  |             |             |             |             |
| 88 | Hungary              | 6   | 0.164602207 | 61.33850783 | 1199.987385 | 385.7592296 |
| 89 | Iceland              | 4   | 0.073136405 | 1.243798762 | 20.50267503 | 6.229460694 |
| 90 | India                | 193 | 0.27560445  | 422633.7606 | 14089194.72 | 1562131.294 |
| 91 | Indonesia            | 312 | 0.366531916 | 76549.0703  | 2508644.908 | 155558.1368 |
| 92 | Iran, Islamic Rep.   | 13  | 0.281732912 | 818.1583839 | 22750.26412 | 4404.832344 |
| 93 | Iraq                 | 41  | 0.145789801 | 942.3007407 | 33085.61089 | 6990.366671 |
| 94 | Ireland              | 6   | 0.073486405 | 29.95142387 | 541.1844828 | 110.9038635 |
| 95 | Isle of Man          |     |             |             |             |             |
| 96 | Israel               | 3   | 0.079294854 | 25.99997756 | 477.11642   | 140.4693229 |
| 97 | Italy                | 7   | 0.09553505  | 425.8261078 | 6779.086375 | 1133.743867 |
| 98 | Jamaica              | 3   | 0.216251473 | 10.44341698 | 337.4514229 | 128.9163056 |

|     |                           |     |             |             |             |             |
|-----|---------------------------|-----|-------------|-------------|-------------|-------------|
| 99  | Japan                     | 13  | 0.18501688  | 3852.444569 | 43940.77841 | 5626.217277 |
| 100 | Jordan                    | 6   | 0.026408775 | 29.49293872 | 823.7135537 | 248.69909   |
| 101 | Kazakhstan                | 68  | 0.201680842 | 768.4159961 | 33258.59743 | 5146.864035 |
| 102 | Kenya                     | 267 | 0.268673154 | 16781.14519 | 653327.059  | 58887.28473 |
| 103 | Kiribati                  | 436 | 0.427305359 | 68.63759033 | 2620.39326  | 156.2908823 |
| 104 | Korea, Dem. People's Rep. | 513 |             |             |             |             |
| 105 | Korea, Rep.               | 59  |             |             |             |             |
| 106 | Kosovo                    |     |             |             |             |             |
| 107 | Kuwait                    | 22  | 0.118998588 | 26.39695075 | 693.995515  | 348.3571174 |
| 108 | Kyrgyz Republic           | 110 | 0.220525785 | 405.3965584 | 17871.30399 | 2429.586847 |
| 109 | Lao PDR                   | 155 | 0.15685566  | 2093.42744  | 76354.2791  | 5188.080998 |
| 110 | Latvia                    | 26  | 0.18023144  | 53.36331414 | 1549.547691 | 286.9724717 |
| 111 | Lebanon                   | 13  | 0.112747315 | 41.84592733 | 1147.343747 | 428.7875628 |
| 112 | Lesotho                   | 654 | 0.288332561 | 2597.805816 | 112308.1018 | 4939.386011 |
| 113 | Liberia                   | 308 | 0.20373991  | 1062.129742 | 40068.92903 | 4063.148238 |
| 114 | Libya                     | 59  | 0.163869375 | 83.66465867 | 2554.532015 | 653.6697296 |
| 115 | Liechtenstein             |     |             |             |             |             |
| 116 | Lithuania                 | 42  | 0.185949609 | 152.37234   | 4821.167948 | 668.1599919 |
| 117 | Luxembourg                | 9   | 0.078303623 | 1.780532369 | 30.77958626 | 13.78859585 |
| 118 | Macao SAR, China          | 65  |             |             |             |             |
| 119 | Madagascar                | 233 | 0.231446865 | 12267.82652 | 511527.8554 | 42817.85224 |
| 120 | Malawi                    | 146 | 0.129878562 | 7861.238328 | 315037.2335 | 22612.19471 |
| 121 | Malaysia                  | 92  | 0.273203523 | 1991.696971 | 54349.50779 | 11445.35077 |
| 122 | Maldives                  | 36  | 0.243722914 | 13.93200125 | 352.0248059 | 99.51553307 |
| 123 | Mali                      | 52  | 0.198780113 | 5637.698244 | 246185.5183 | 16710.61389 |
| 124 | Malta                     | 14  | 0.084663933 | 1.192844779 | 20.94867987 | 11.5087323  |
| 125 | Marshall Islands          | 483 | 0.406432954 | 7.57361632  | 285.1902817 | 31.44786341 |
| 126 | Mauritania                | 89  | 0.175561001 | 481.6805632 | 15369.21546 | 1828.212404 |
| 127 | Mauritius                 | 12  | 0.286333352 | 14.68947382 | 441.3585724 | 167.2384248 |
| 128 | Mexico                    | 23  | 0.27214932  | 2596.341074 | 87986.51899 | 10610.3886  |
| 129 | Micronesia, Fed. Sts.     | 100 | 0.383039679 | 11.44643622 | 413.4276491 | 47.13236638 |
| 130 | Moldova                   | 80  | 0.219308557 | 184.4738422 | 7129.072626 | 1182.748858 |
| 131 | Monaco                    | 0   | 0.077044537 | 0.862147238 | 14.12762179 | 1.578422123 |
| 132 | Mongolia                  | 428 | 0.266565329 | 371.1618055 | 16941.79715 | 1944.207441 |
| 133 | Montenegro                | 15  | 0.165949908 | 4.286860362 | 123.0262088 | 27.33219716 |
| 134 | Morocco                   | 97  | 0.187550966 | 3931.929106 | 117120.1727 | 13351.41216 |
| 135 | Mozambique                | 361 | 0.216612366 | 20700.16315 | 877406.6715 | 38758.98328 |
| 136 | Myanmar                   | 322 | 0.372273461 | 14313.25453 | 477162.1736 | 42335.03879 |
| 137 | Namibia                   | 486 | 0.210559553 | 830.6173696 | 33118.39692 | 4044.491252 |
| 138 | Nauru                     | 182 | 0.32612218  | 0.567717582 | 25.18035612 | 3.951471524 |
| 139 | Nepal                     | 238 | 0.146337537 | 7488.11457  | 230742.6656 | 21937.03752 |

|     |                           |     |             |             |             |             |
|-----|---------------------------|-----|-------------|-------------|-------------|-------------|
| 140 | Netherlands               | 5   | 0.074779317 | 98.88910706 | 1465.312073 | 317.2059204 |
| 141 | New Caledonia             | 9   |             |             |             |             |
| 142 | New Zealand               | 8   | 0.128812417 | 17.91411648 | 344.7101857 | 103.2880795 |
| 143 | Nicaragua                 | 43  | 0.237611816 | 142.558508  | 4940.037809 | 699.2314772 |
| 144 | Niger                     | 84  | 0.20302597  | 5882.152151 | 280080.1713 | 17105.10961 |
| 145 | Nigeria                   | 219 | 0.201389625 | 45278.09744 | 1917038.621 | 155290.9052 |
| 146 | North Macedonia           | 12  | 0.189107004 | 37.59426091 | 984.4051902 | 139.5857739 |
| 147 | Northern Mariana Islands  | 103 | 0.297114874 | 1.1597437   | 34.03452266 | 9.524604796 |
| 148 | Norway                    | 3   | 0.078590859 | 43.54784774 | 598.2538578 | 83.05162141 |
| 149 | Oman                      | 9   | 0.126810988 | 18.26774867 | 620.0039113 | 316.5224465 |
| 150 | Pakistan                  | 263 | 0.15284613  | 62773.89113 | 2742876.09  | 274457.4886 |
| 151 | Palau                     | 38  | 0.320556203 | 0.810701324 | 25.16246749 | 5.196013375 |
| 152 | Panama                    | 37  | 0.225725643 | 188.3338743 | 6870.605872 | 719.8037522 |
| 153 | Papua New Guinea          | 432 | 0.402700191 | 1538.169086 | 67391.91227 | 5912.97698  |
| 154 | Paraguay                  | 46  | 0.2368812   | 241.7160379 | 8371.28884  | 1019.873389 |
| 155 | Peru                      | 119 | 0.141770963 | 1943.260313 | 67121.63074 | 9172.404282 |
| 156 | Philippines               | 554 | 0.385533521 | 29181.11112 | 1010250.538 | 135443.5253 |
| 157 | Poland                    | 15  | 0.181569078 | 558.8372533 | 15026.40797 | 1984.683375 |
| 158 | Portugal                  | 19  | 0.085899264 | 224.2406909 | 4395.321809 | 593.0262216 |
| 159 | Puerto Rico               | 1   | 0.16290449  | 20.62132478 | 439.2361222 | 119.0411077 |
| 160 | Qatar                     | 35  | 0.128238371 | 8.622841524 | 340.4058248 | 181.7960586 |
| 161 | Romania                   | 66  | 0.183169763 | 941.1446985 | 32173.82489 | 3366.895322 |
| 162 | Russian Federation        | 50  | 0.196828276 | 7982.249373 | 307243.8607 | 35241.77087 |
| 163 | Rwanda                    | 57  | 0.203513421 | 3960.126437 | 155729.1138 | 11020.66985 |
| 164 | Samoa                     | 11  | 0.339698086 | 12.83675081 | 412.4656151 | 78.09443413 |
| 165 | San Marino                | 0   | 0.076627063 | 0.210536875 | 3.173979167 | 0.664624644 |
| 166 | Sao Tome and Principe     | 114 | 0.175207878 | 19.7504924  | 665.1688365 | 93.5558141  |
| 167 | Saudi Arabia              | 10  | 0.183034196 | 1300.74163  | 48317.15751 | 7383.278575 |
| 168 | Senegal                   | 117 | 0.202599734 | 3732.121977 | 132325.5951 | 12106.11193 |
| 169 | Serbia                    | 14  | 0.174109598 | 128.1465001 | 2969.751969 | 500.955237  |
| 170 | Seychelles                | 16  | 0.302071768 | 3.811230463 | 94.93100146 | 23.41191838 |
| 171 | Sierra Leone              | 295 | 0.208262056 | 2509.144487 | 109594.8816 | 8521.222519 |
| 172 | Singapore                 | 41  |             |             |             |             |
| 173 | Sint Maarten (Dutch part) | 14  |             |             |             |             |
| 174 | Slovak Republic           | 5   | 0.163541924 | 30.98951656 | 743.3853522 | 188.5222192 |
| 175 | Slovenia                  | 5   | 0.137346299 | 12.69067243 | 243.6837625 | 60.6907112  |
| 176 | Solomon Islands           | 66  | 0.36771582  | 43.63624704 | 1796.43376  | 206.3856395 |
| 177 | Somalia                   | 258 | 0.176123926 | 20220.54196 | 934426.4976 | 33255.72486 |
| 178 | South Africa              | 615 | 0.452178193 | 19784.52892 | 765196.3422 | 106018.6299 |
| 179 | South Sudan               | 227 | 0.243498522 | 4387.072564 | 189875.9773 | 11267.66548 |
| 180 | Spain                     | 9   | 0.029729722 | 378.1403276 | 6535.273486 | 1001.629571 |
| 181 | Sri Lanka                 | 64  | 0.292350119 | 873.1306029 | 23638.16142 | 6607.203996 |

|     |                                |     |             |             |             |             |
|-----|--------------------------------|-----|-------------|-------------|-------------|-------------|
| 182 | St. Kitts and Nevis            | 2   | 0.203760205 | 0.96424324  | 30.96088856 | 6.347784297 |
| 183 | St. Lucia                      | 4   | 0.232029673 | 4.258304349 | 135.1163787 | 19.77412264 |
| 184 | St. Martin (French part)       |     |             |             |             |             |
| 185 | St. Vincent and the Grenadines | 4   | 0.252906961 | 2.675059199 | 84.87897118 | 13.27323457 |
| 186 | Sudan                          | 67  | 0.177445576 | 1109.805409 | 43526.35709 | 7212.410741 |
| 187 | Suriname                       | 29  | 0.263025409 | 10.22046112 | 354.9158233 | 57.68429084 |
| 188 | Sweden                         | 6   | 0.18226965  | 79.13202188 | 1004.28596  | 232.3783599 |
| 189 | Switzerland                    | 5   | 0.076510978 | 38.69245582 | 575.2249583 | 184.7040582 |
| 190 | Syrian Arab Republic           | 19  | 0.145932792 | 80.23791615 | 2783.797449 | 963.9383565 |
| 191 | Tajikistan                     | 83  | 0.26508328  | 743.0815965 | 36020.24457 | 3533.310375 |
| 192 | Tanzania                       | 237 | 0.131010722 | 20170.30542 | 822117.8686 | 58092.84128 |
| 193 | Thailand                       | 150 | 0.275839683 | 7774.679821 | 153659.4905 | 28778.97967 |
| 194 | Timor-Leste                    | 498 | 0.348606803 | 298.5537388 | 9893.36587  | 1021.247524 |
| 195 | Togo                           | 37  | 0.198936359 | 2123.878762 | 82135.84797 | 7216.218564 |
| 196 | Tonga                          | 11  | 0.348354022 | 4.54611468  | 130.8273134 | 26.69443449 |
| 197 | Trinidad and Tobago            | 18  | 0.239972805 | 19.89543151 | 577.7350451 | 115.124637  |
| 198 | Tunisia                        | 35  | 0.138221707 | 120.8885303 | 2943.930488 | 1052.183144 |
| 199 | Turkey                         | 16  | 0.188848147 | 833.1649877 | 23101.36583 | 9605.06496  |
| 200 | Turkmenistan                   | 45  | 0.232395878 | 436.6209674 | 20359.5274  | 1851.699198 |
| 201 | Turks and Caicos Islands       | 12  |             |             |             |             |
| 202 | Tuvalu                         | 296 | 0.378010941 | 1.091282395 | 34.37940952 | 4.848544268 |
| 203 | Uganda                         | 200 | 0.355745112 | 13885.54225 | 580885.1257 | 37901.05678 |
| 204 | Ukraine                        | 77  | 0.212636742 | 4043.261828 | 154201.3145 | 13891.77902 |
| 205 | United Arab Emirates           | 1   | 0.317757598 | 119.0259778 | 4900.451078 | 1455.215967 |
| 206 | United Kingdom                 | 8   | 0.085724798 | 390.3616224 | 7545.336695 | 1455.215967 |
| 207 | United States                  | 3   | 0.118588217 | 977.6758327 | 21133.23414 | 3897.972144 |
| 208 | Uruguay                        | 35  | 0.17868849  | 55.92164717 | 1439.756404 | 232.0301817 |
| 209 | Uzbekistan                     | 67  | 0.22475033  | 2444.91299  | 107050.7712 | 10941.12039 |
| 210 | Vanuatu                        | 41  | 0.400665586 | 41.21048147 | 1466.165722 | 143.179109  |
| 211 | Venezuela, RB                  | 45  | 0.245535407 | 825.9232205 | 24630.11604 | 3263.400236 |
| 212 | Vietnam                        | 176 | 0.45040707  | 18680.56476 | 477077.7272 | 50028.75043 |
| 213 | Virgin Islands (U.S.)          |     |             |             |             |             |
| 214 | West Bank and Gaza             | 1   |             |             |             |             |
| 215 | Yemen, Rep.                    | 48  | 0.185236426 | 1029.302863 | 39749.88416 | 6051.547694 |
| 216 | Zambia                         | 333 | 0.17735988  | 7056.142193 | 296242.047  | 21521.49685 |
| 217 | Zimbabwe                       | 199 | 0.121891023 | 10465.15198 | 441287.7211 | 19251.9176  |
